# Supplementary material
Source: Springer Nature journal article supplement (https://www.springermedizin.de/resource/supplementary/12884_2005_102_MOESM4_ESM.pdf/9459680)

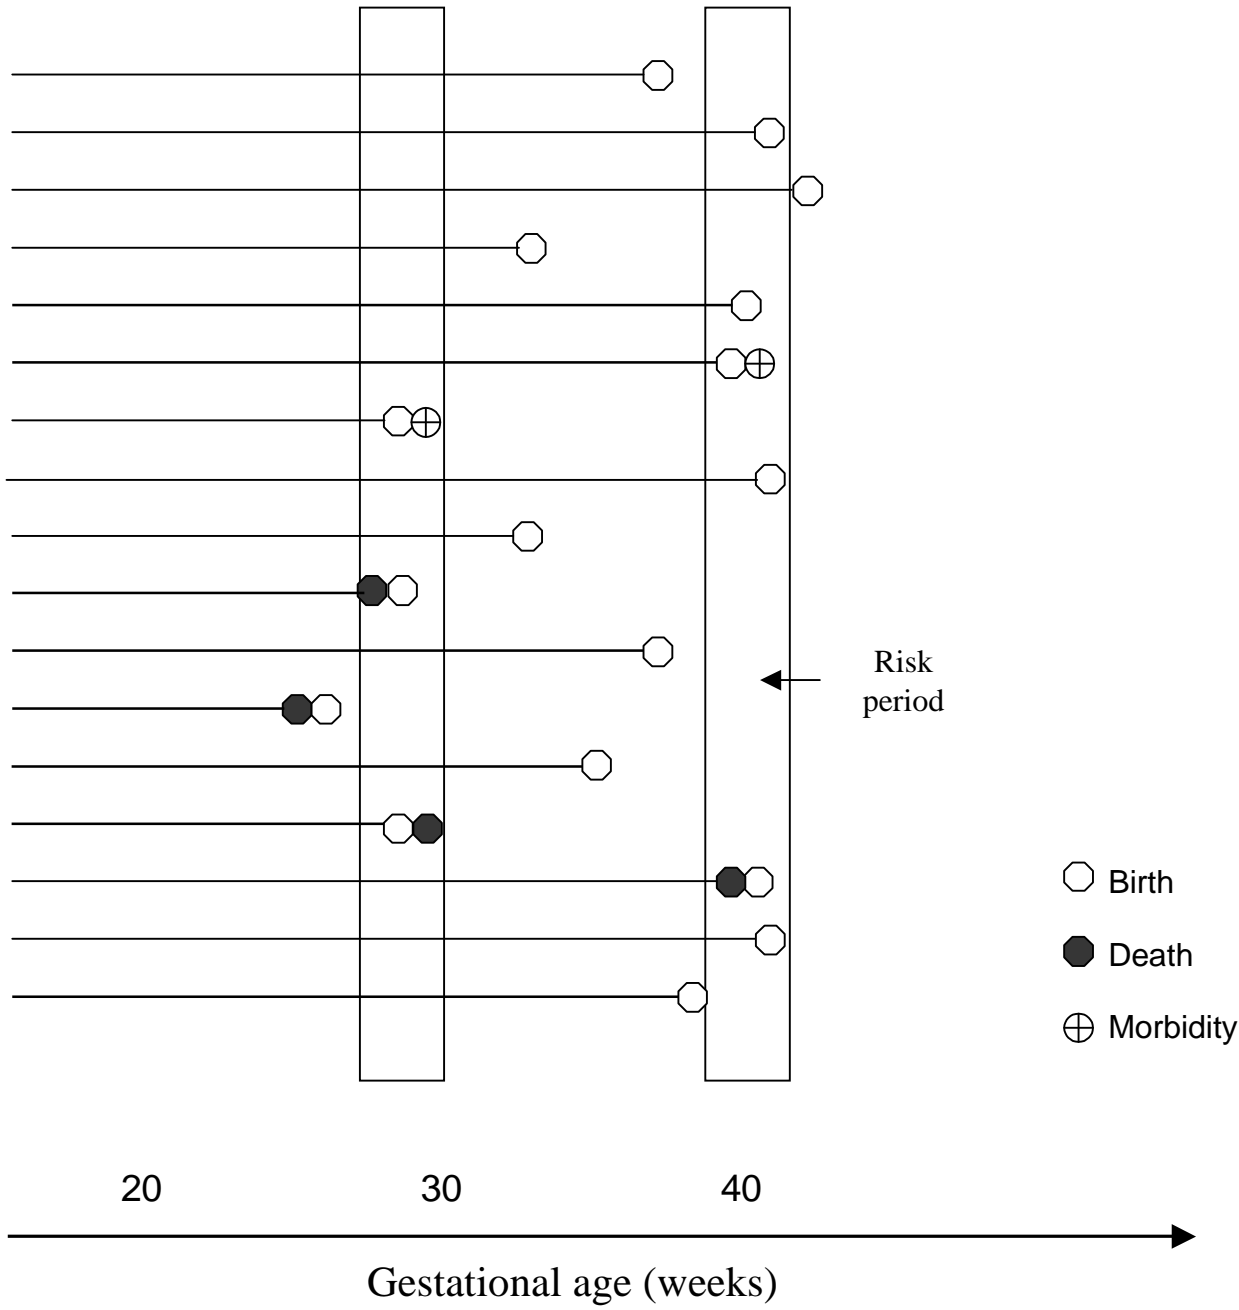

Supplement: MOESM4 [file 9459680]
